# Supplementary material for: Computational Analysis Reveals Distinctive Interaction of miRNAs with Target Genes in the Pathogenesis of Chronic Kidney Disease
Source: MDPI journal article supplement (doi:10.3390/genes14040898), 2023-04-12
Supplement: s1 [file s1]

**Supplementary Table S1. Details of miRNA datasets.**

| <b>Sr. No</b> | <b>Accession ID</b> | <b>Gene Expression Platform</b> | <b>Sample Size</b> | <b>No. of Cases</b> | <b>No. of Control</b> | <b>Disease</b>         | <b>Reference</b>                                                                                                                                                                                                                                                                                                                            |
|---------------|---------------------|---------------------------------|--------------------|---------------------|-----------------------|------------------------|---------------------------------------------------------------------------------------------------------------------------------------------------------------------------------------------------------------------------------------------------------------------------------------------------------------------------------------------|
| 1             | GSE51674            | Expression Profiling by Array   | 16                 | 12                  | 4                     | Diabetic Nephropathy   | Conserva F, Barozzino M, Pesce F, Divella C, Oranger A et al. Urinary miRNA-27b-3p and miRNA-1228-3p correlate with the progression of kidney fibrosis in diabetic nephropathy. Sci. Rep. 2019; 9(1):1-1. <a href="https://doi.org/10.1038/s41598-019-47778-1">https://doi.org/10.1038/s41598-019-47778-1</a>                               |
| 2             | GSE89699            | Expression Profiling by Array   | 8                  | 7                   | 1                     | Chronic Kidney Disease | Vijayaraghavan B, Jeyamohan S, Padmanabhan G, Velangann AJ, Ramanathan K. Circulatory microRNA expression profile for coronary artery calcification in chronic kidney disease patients. Afr. Health Sci. 2021; 21(2):728-34. <a href="https://doi.org/10.4314/ahs.v21i2.31">https://doi.org/10.4314/ahs.v21i2.31</a>                        |
| 3             | GSE80247            | Expression Profiling by Array   | 58                 | 21                  | 37                    | Chronic Kidney Disease | Trevisani F, Ghidini M, Larcher A, Lampis A, Lote H, Papale M et al. MicroRNA 193b-3p as a predictive biomarker of chronic kidney disease in patients undergoing radical nephrectomy for renal cell carcinoma. Br. J. Cancer 2016; 115(11):1343-50. <a href="https://doi.org/10.1038/bjc.2016.329">https://doi.org/10.1038/bjc.2016.329</a> |

**Supplementary Table S2. Details of genes datasets.**

| <b>Sr. No</b> | <b>Accession ID</b> | <b>Gene Expression Platform</b> | <b>Sample Size</b> | <b>No. of Cases</b> | <b>No. of Control</b> | <b>Disease</b>          | <b>Reference</b>                                                                                                                                                                                                                                                                                                                    |
|---------------|---------------------|---------------------------------|--------------------|---------------------|-----------------------|-------------------------|-------------------------------------------------------------------------------------------------------------------------------------------------------------------------------------------------------------------------------------------------------------------------------------------------------------------------------------|
| 1             | GSE37171            | Expression Profiling by Array   | 115                | 75                  | 40                    | Uremia                  | Scherer A, Günther OP, Balshaw RF, Hollander Z, Wilson-McManus J, Ng R et al. Alteration of human blood cell tran-scriptome in uremia. BMC Med. Genet. 2013; 6(1):1-3. <a href="https://doi.org/10.1186/1755-8794-6-23">https://doi.org/10.1186/1755-8794-6-23</a>                                                                  |
| 2             | GSE43484            | Expression Profiling by Array   | 6                  | 3                   | 3                     | Uremia                  | Al-Chaqmaqchi HA, Moshfegh A, Dadfar E, Paulsson J, Hassan M, Jacobson SH, et al. Activation of Wnt/ $\beta$ -catenin path-way in monocytes derived from chronic kidney disease patients. PLoS One 2013; 8(7): e68937. <a href="https://doi.org/10.1371/journal.pone.0068937">https://doi.org/10.1371/journal.pone.0068937</a>      |
| 3             | GSE66494            | Expression Profiling by Array   | 61                 | 53                  | 8                     | Chronic Kidney Disease  | Nakagawa S, Nishihara K, Miyata H, Shinke H, Tomita E, Kajiwara M et al. Molecular markers of tubulointerstitial fi-brosis and tubular cell damage in patients with chronic kidney disease. PloS One 2015; 10(8): e0136994. <a href="https://doi.org/10.1371/journal.pone.0136994">https://doi.org/10.1371/journal.pone.0136994</a> |
| 4             | GSE142153           | Expression Profiling by Array   | 40                 | 30                  | 10                    | End Stage Renal Disease | Sur S, Nguyen M, Boada P, Sigdel TK, Sollinger H, Sarwal MM. FcER1: A Novel Molecule Implicated in the Progression of Human Diabetic Kidney Disease. Front. Immunol. 2021; 12. <a href="https://doi.org/10.3389/fimmu.2021.769972">https://doi.org/10.3389/fimmu.2021.769972</a>                                                    |
